# Supplementary material
Source: Springer Nature journal article supplement (https://www.springermedizin.de/resource/supplementary/12885_2007_869_MOESM20_ESM.pdf/9470540)

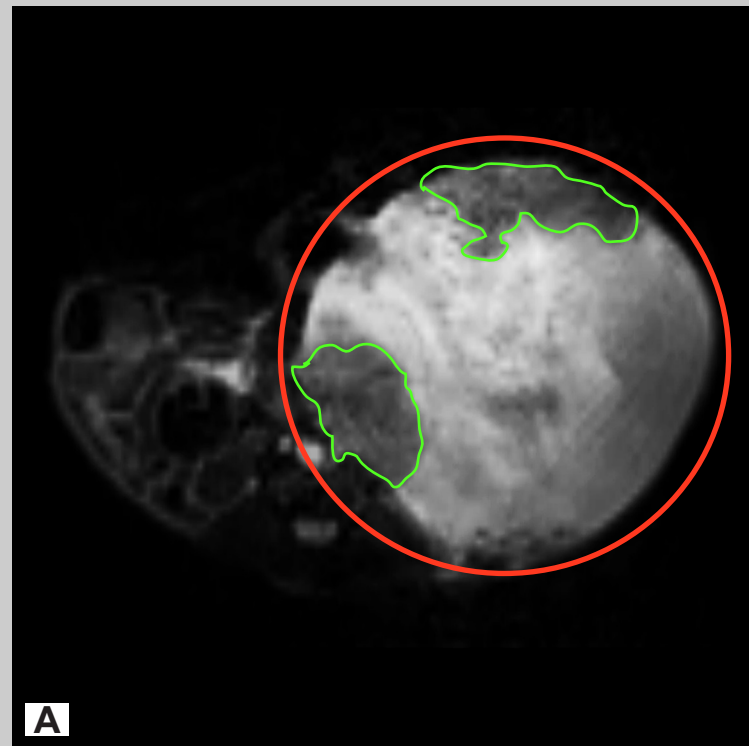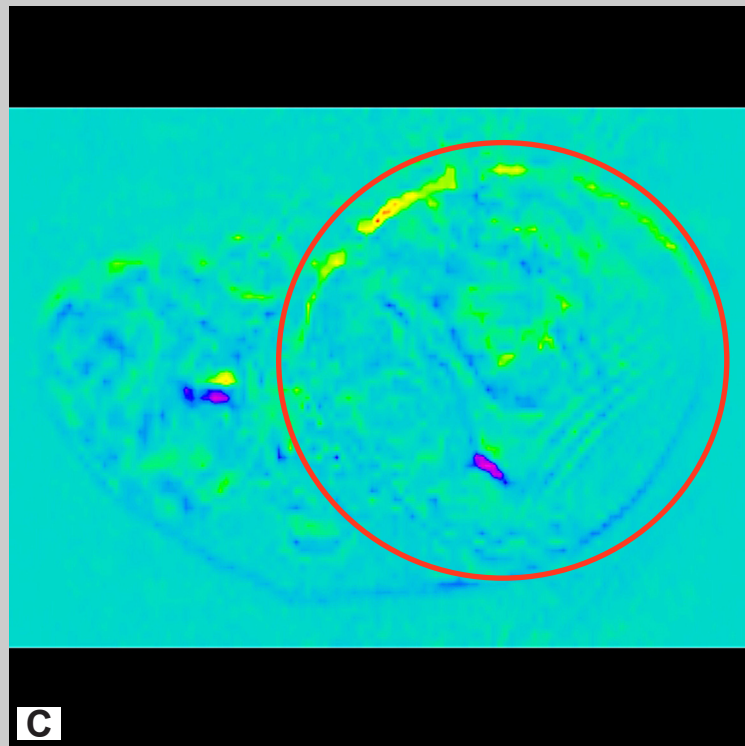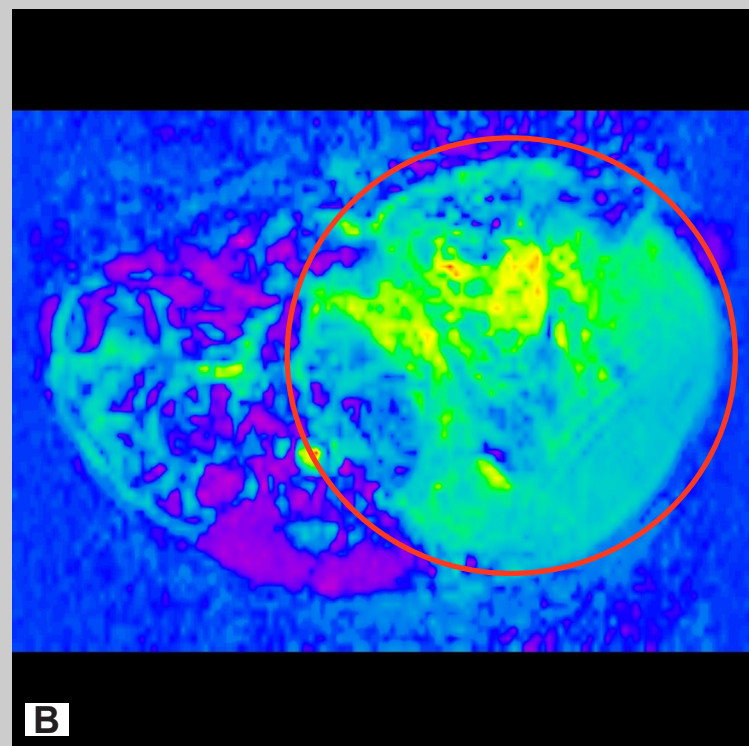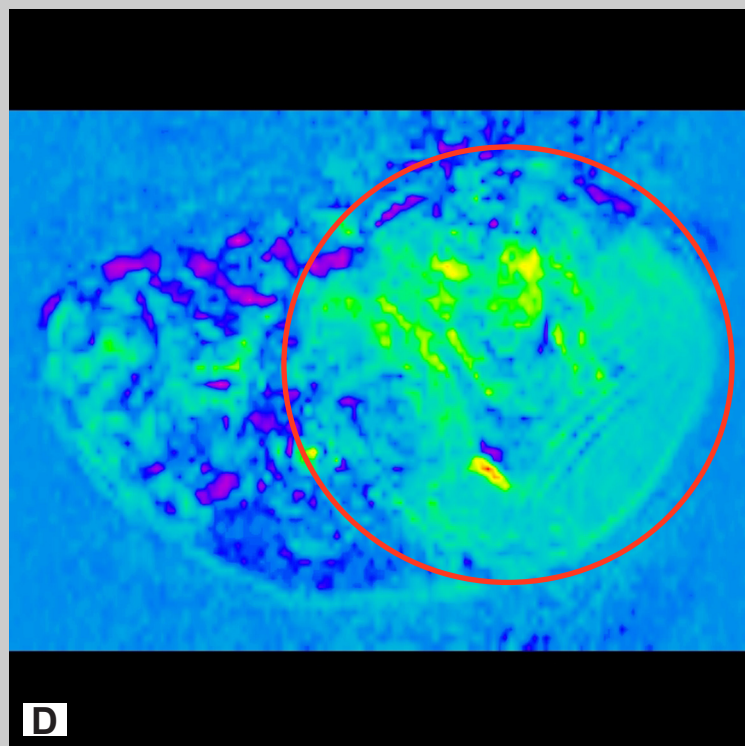

C:122

W:234

239

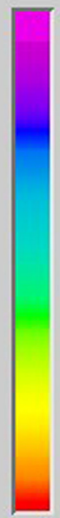

5

Supplement: MOESM20 [file 9470540]
